# Supplementary material for: Agronomic performance of Populus deltoides trees engineered for biofuel production
Source: PubMed Central journal article supplement (PMC5707814; doi:10.1186/s13068-017-0934-6), 2017-11-30

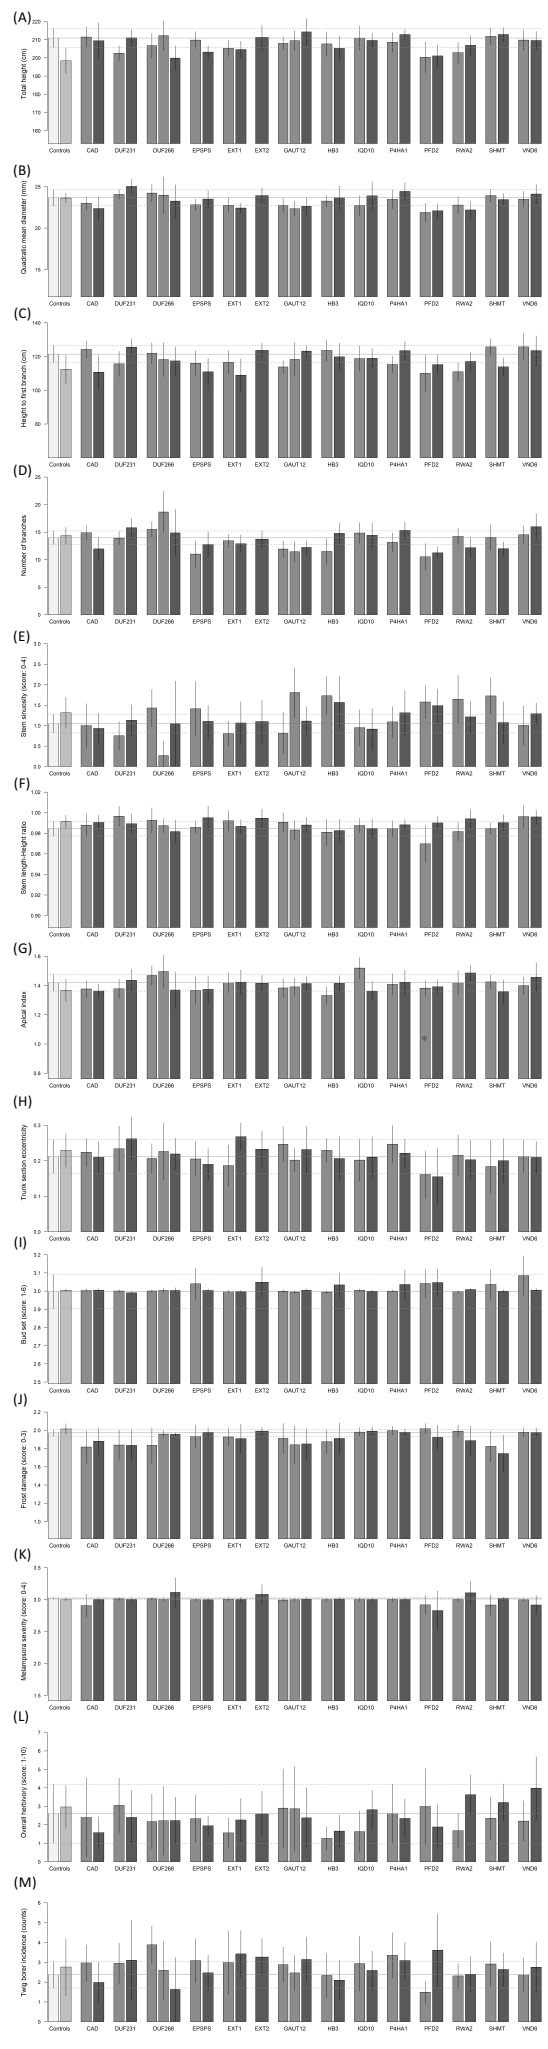

Supplement: 13068_2017_934_MOESM2_ESM.pdf [file 13068_2017_934_MOESM2_ESM.pdf]
